# Supplementary material
Source: Springer Nature journal article supplement (https://www.springermedizin.de/resource/supplementary/13014_2010_347_MOESM8_ESM.pdf/9633586)

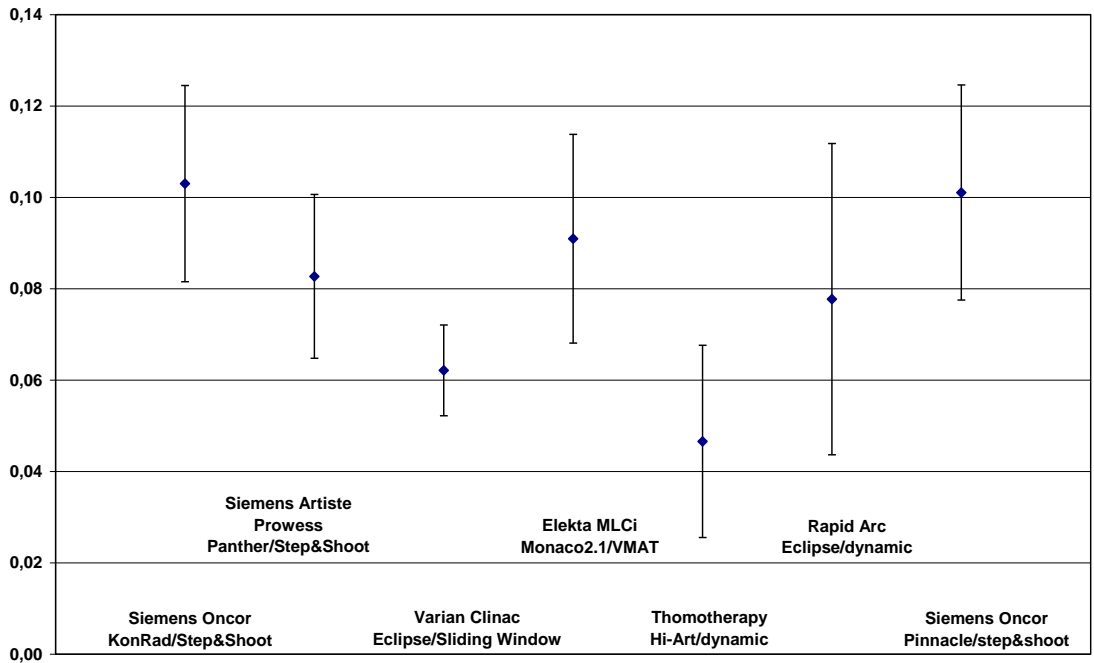

Supplement: MOESM8 [file 9633586]
